# Supplementary material for: Hybrid-LLM-GNN: integrating large language models and graph neural networks for enhanced materials property prediction
Source: Royal Society of Chemistry journal article supplement (doi:10.1039/d4dd00199k), 2024-12-18
Supplement: d4dd00199k2.pdf [file d4dd00199k2.pdf]

## **Supplementary Information: Hybrid-LLM-GNN: Integrating Large Language Models and Graph Neural Networks for Enhanced Materials Property Prediction**

Youjia Li<sup>1</sup>, Vishu Gupta<sup>1,2,3</sup>, Muhammed Nur Talha Kilic<sup>4</sup>, Kamal Choudhary<sup>5</sup>, Daniel Wines<sup>5</sup>, Wei-keng Liao<sup>1</sup>, Alok Choudhary<sup>1</sup>, Ankit Agrawal<sup>1</sup>

<sup>1</sup>*Department of Electrical and Computer Engineering, Northwestern University, Evanston, IL, USA.*

<sup>2</sup>*Lewis-Sigler Institute for Integrative Genomics, Princeton University, Princeton, NJ, USA.*

<sup>3</sup>*Ludwig Institute for Cancer Research, Princeton University, Princeton, NJ, USA.*

<sup>4</sup>*Department of Computer Science, Northwestern University, Evanston, IL, USA.*

<sup>5</sup>*Material Measurement Laboratory, National Institute of Standards and Technology, 100 Bureau Dr, Gaithersburg, MD, USA.*

Table 1: Dataset size and baseline test MAE using mean of combined train and validation sets as the prediction on the test set for evaluated material properties

| <b>Property</b>                 | <b>Train set size</b> | <b>Validation set size</b> | <b>Test set size</b> | <b>Baseline MAE</b> |
|---------------------------------|-----------------------|----------------------------|----------------------|---------------------|
| Formation Energy (eV/atom)      | 60639                 | 7580                       | 7580                 | 0.8546              |
| Ehull (eV/atom)                 | 59939                 | 7494                       | 7493                 | 0.2618              |
| Magout ( $\mu_B$ )              | 59370                 | 7422                       | 7422                 | 2.1585              |
| Bandgap <sub>mBJ</sub> (eV)     | 15642                 | 1957                       | 1957                 | 1.6565              |
| Spillage                        | 9041                  | 1131                       | 1131                 | 0.5055              |
| SLME (%)                        | 7810                  | 977                        | 977                  | 10.7721             |
| Tc <sub>supercon</sub> (K) (eV) | 842                   | 106                        | 106                  | 3.2085              |

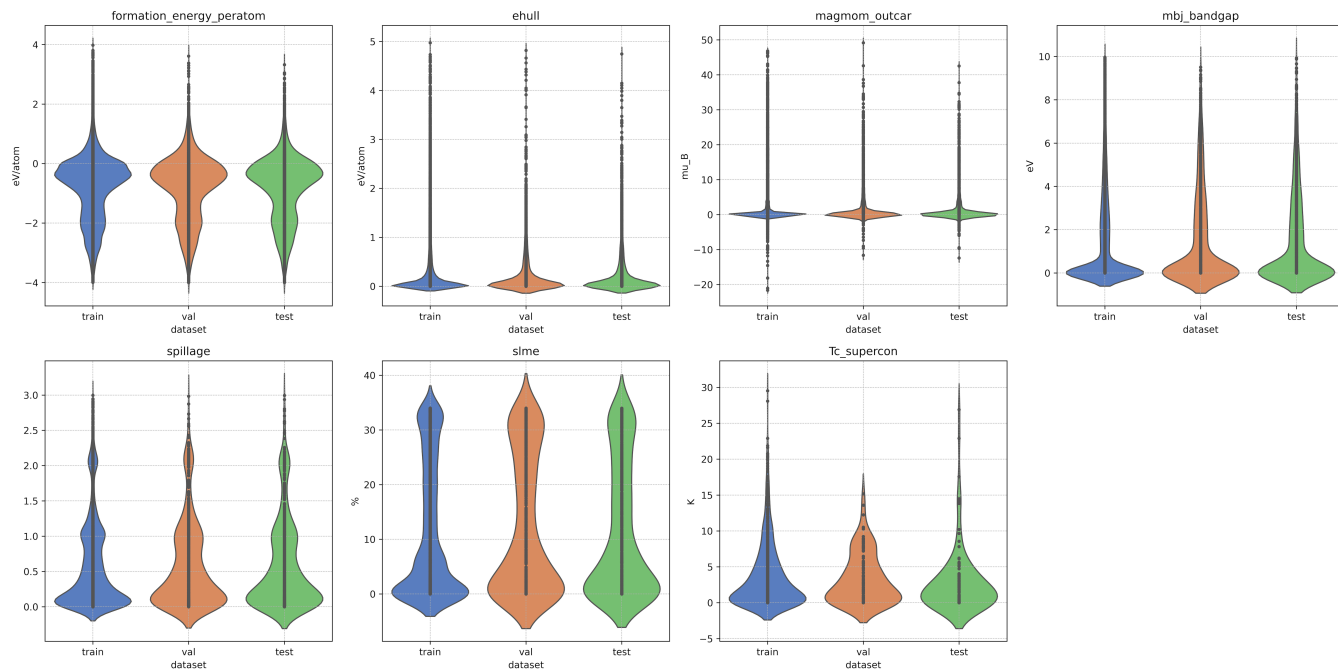

Figure 1: Violin plot for the distribution of DFT-calculated properties; Displayed material properties include: Formation Energy, Ehull, Magout, Bandgap<sub>mbj</sub>, Spillage, SLME and Tc<sub>supercon</sub>

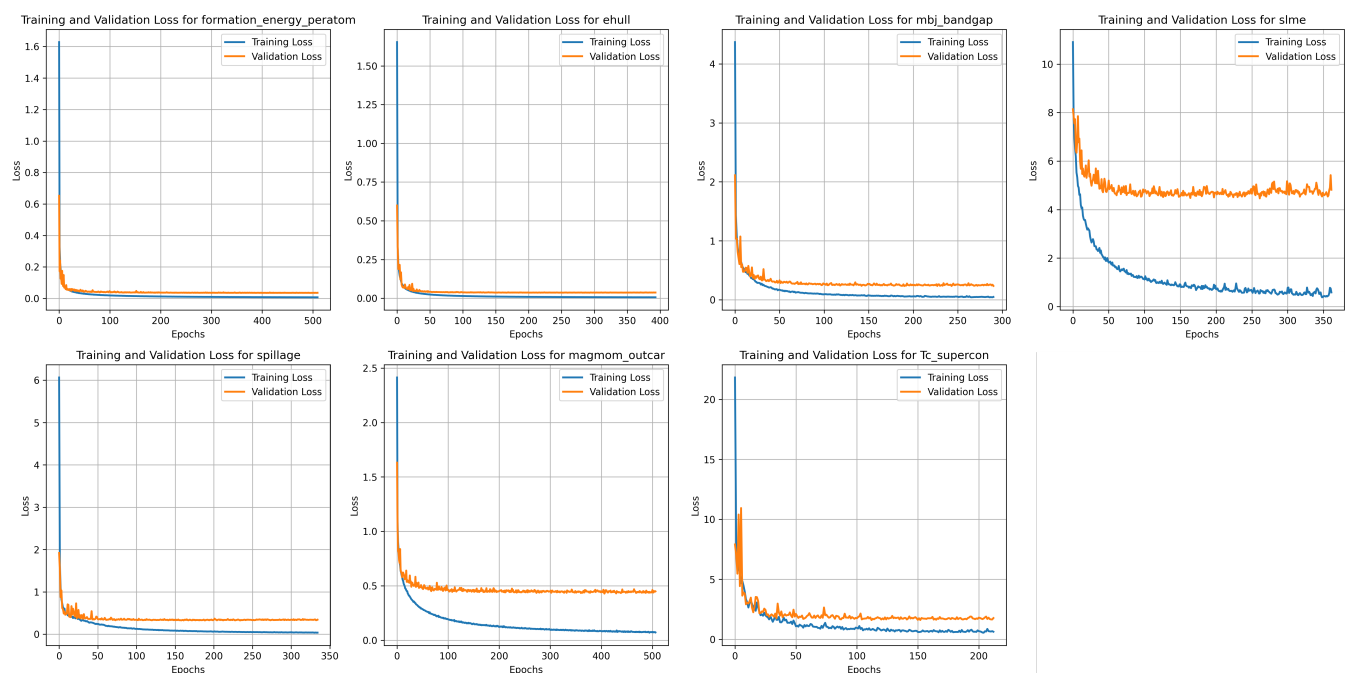

Figure 2: Loss curves for the predictor model of ALIGNN-MatBERT TL approach. Early-stopping is applied in model training, which decides the number of epoches. Displayed material properties include: Formation Energy, Ehull, Magout, Bandgap<sub>mbj</sub>, Spillage, SLME and Tc<sub>supercon</sub>

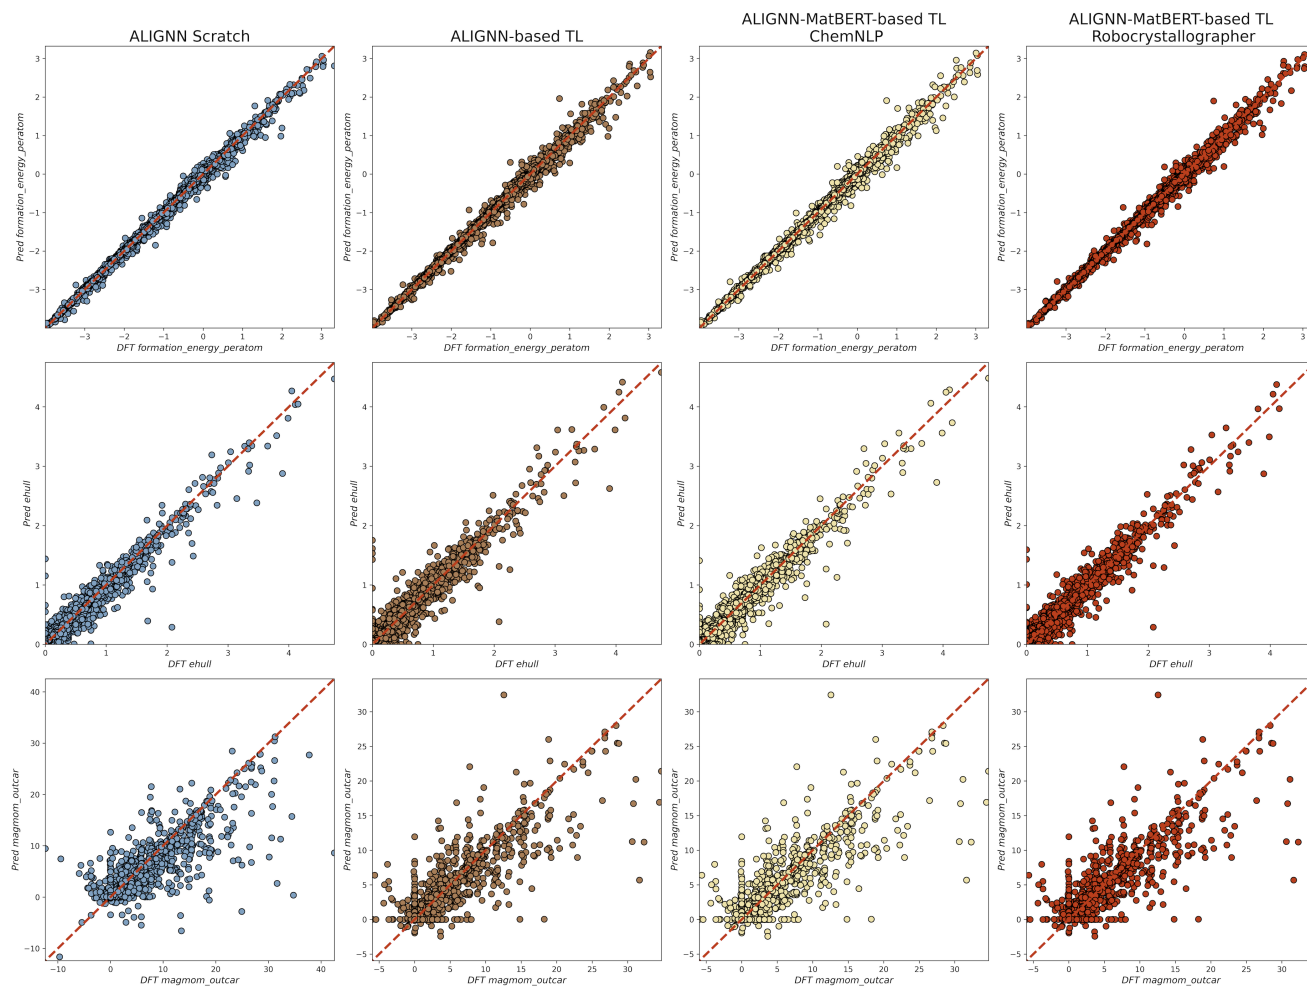

Figure 3: Parity plot of the original ALIGNN model (1st col), ALIGNN-based feature extraction transfer learning (2nd col), and the proposed hybrid transfer learning approach based on ChemNLP (3rd col) and Robocrystallographer (4th col). Displayed material properties include: Formation Energy, Ehull, and Magout

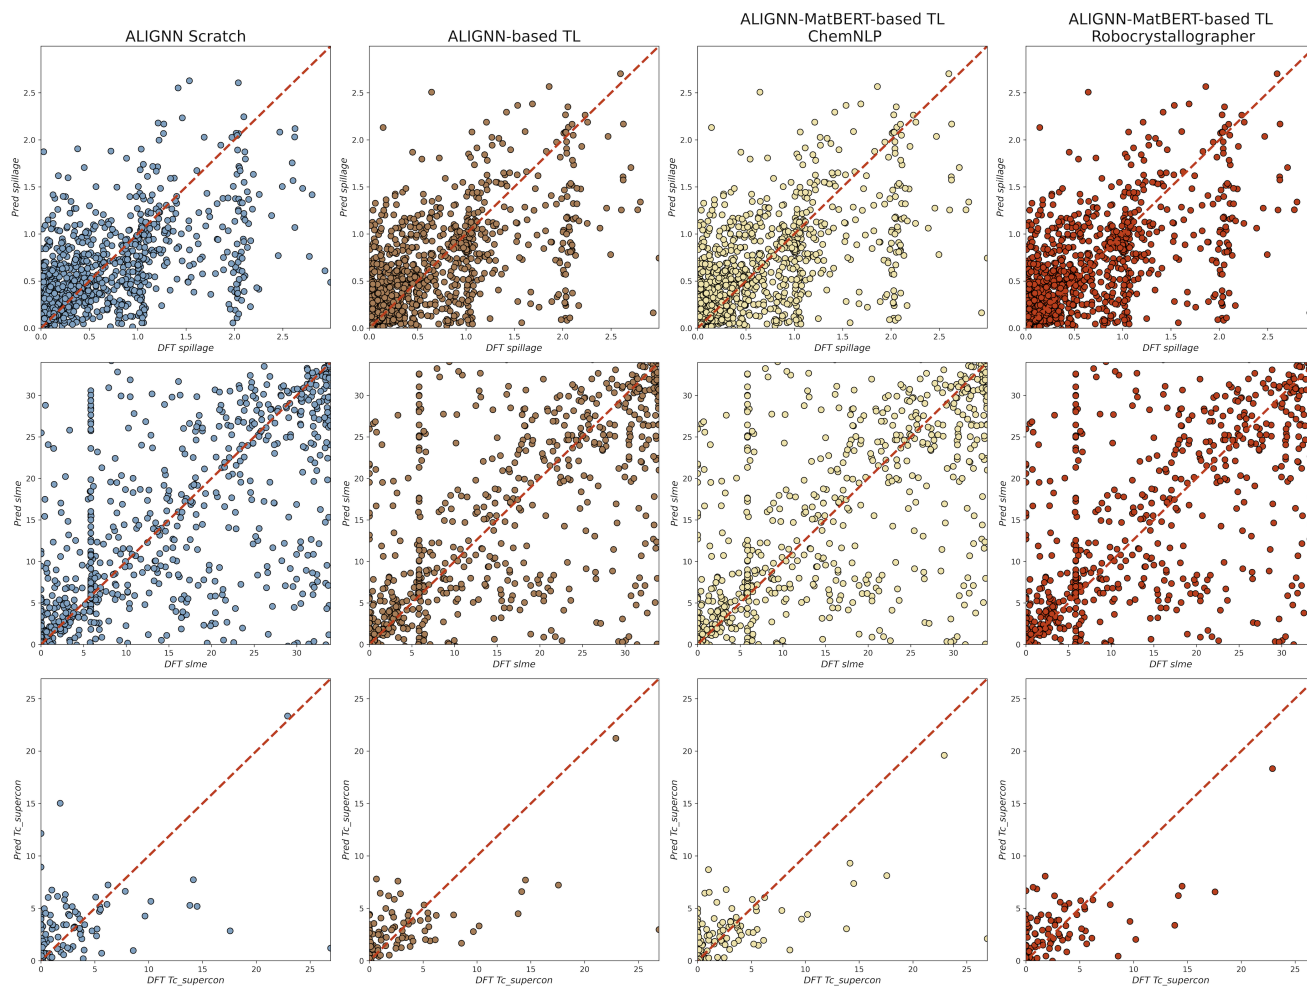

Figure 4: Parity plot of the original ALIGNN model (1st col), ALIGNN-based feature extraction transfer learning (2nd col), and the proposed hybrid transfer learning approach based on ChemNLP (3rd col) and Robocystallographer (4th col). Displayed material properties include: Spillage, SLME and Tc\_supercon

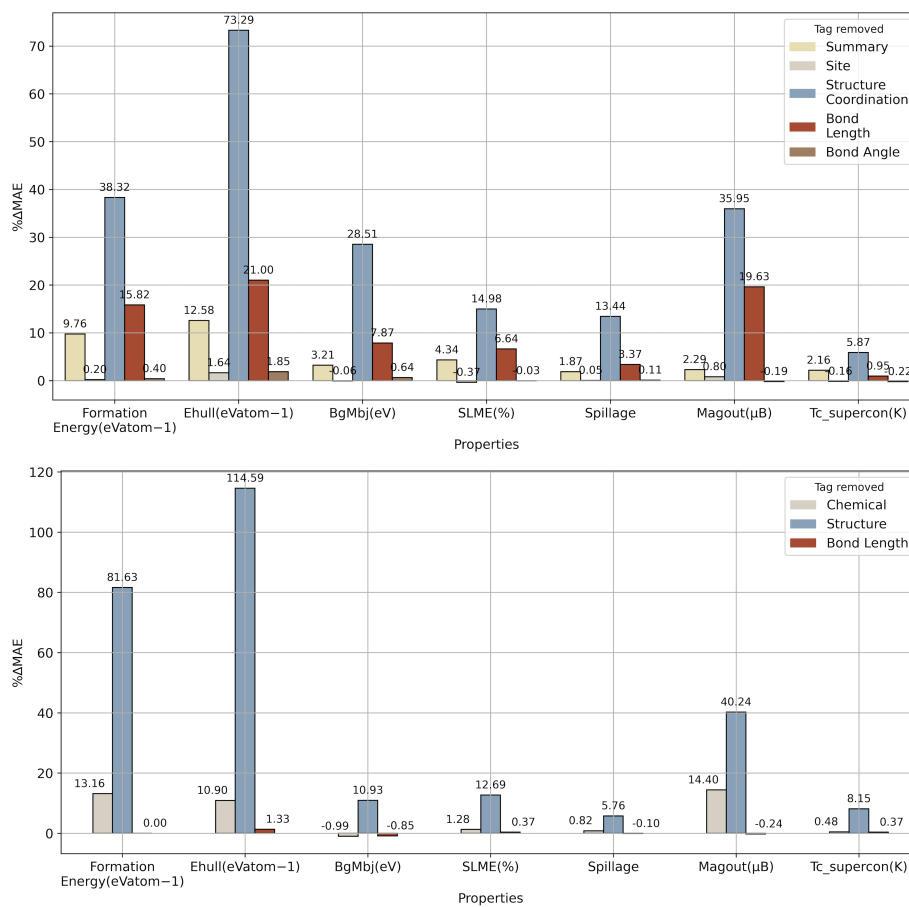

Figure 5: Percentage MAE change for ALIGNN-MatBERT-based TL approach after removal of tagged content from text representation across tested material properties (top: Robocrytalographer; bottom: ChemNLP)
